# Supplementary material
Source: Springer Nature journal article supplement (https://www.springermedizin.de/resource/supplementary/12877_2013_826_MOESM1_ESM.pdf/9440494)
Supplement: MOESM1 [file 9440494]

**Pre-intervention Phase Test 1A**

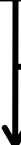

**Pre-intervention Phase Test 1B**

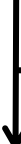

**Intervention Phase Test 2A**

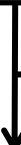

**Intervention Phase Test 2B**

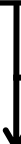

**Post-intervention Phase Test 3**

**Baseline Determination**  
6 Month Duration  
No lifestyle changes

**Exercise Intervention**  
3 days/week Exercise  
3 Month Term

**Exercise Continued**  
3 days/week Exercise  
3 Month Term

**Exercise Continued  
Or Stopped  
Participant's Choice**  
6 Month Term
